# Supplementary material for: An Optimized Approach to Perform Bone Histomorphometry
Source: Front Endocrinol (Lausanne). 2018 Nov 21;9:666. doi: 10.3389/fendo.2018.00666 (PMC6259258; doi:10.3389/fendo.2018.00666)
Supplement: Supplementary file 1 [file Data_Sheet_1.CSV]

import fiji.util.gui.GenericDialogPlus
import ij.IJ
import ij.ImagePlus
import ij.process.ImageProcessor
import ij.ImageStack
import ij.plugin.MontageMaker
import ij.plugin.StackMaker
import ij.process.ImageStatistics
import ij.measure.ResultsTable
import trainableSegmentation.WekaSegmentation
import ij.process.LUT
import trainableSegmentation.utils.Utils
// Create main dialog
gd = new GenericDialogPlus("Trainable Weka Segmentation automatically")
dir1 = ""
dir0 = ""
classifier = ""
units="um"
pixelWidth = 1
pixelHeight = 1
//data = ""
gd.addDirectoryField("Input directory", dir1, 50)
gd.addDirectoryField("Working directory", dir0, 50)
gd.addFileField("Classifier file", classifier, 50)
gd.addStringField("Image units", units, 10)
gd.addNumericField("Pixel width", pixelWidth, 0)
gd.addNumericField("Pixel height", pixelHeight, 0)
gd.showDialog()
// Exit when canceled
if (gd.wasCanceled())
return
// Read user-introduced folders and file
dir1 = gd.getNextString()
dir0 = gd.getNextString()
classifier = gd.getNextString()
units = gd.getNextString()
pixelWidth = gd.getNextNumber()
pixelHeight = gd.getNextNumber()
// calculate pixel area in real units
pixelArea = pixelWidth * pixelHeight
// Check possible errors
if (dir1 == null || dir1.equals("") ) {
IJ.beep()
IJ.error( "No input directory was introduced" )
return
}
if (dir0 == null || dir0.equals("")) {
IJ.beep()
IJ.error( "No working directory was introduced" )
return
}
if (classifier == null || classifier.equals("")) {
IJ.beep()
IJ.error( "No classifier was introduced" )
return
}
if (dir0.equals( dir1 )) {
IJ.beep()
IJ.error("aborted! Input folder couldn't be the working folder")
return
}
// add file separator at the end of paths
dir0 += File.separator
dir1 += File.separator
// Create stacks folder if needed
stackFolder = new File( dir0+"Stacks" )
if( stackFolder.exists() ) {
IJ.log("Folder already exists: " + stackFolder.getAbsolutePath() )
}else{
stackFolder.mkdir()
IJ.log("New folder created: " + stackFolder.getAbsolutePath())
}
stacksFolder=dir0+"Stacks//"
// Create folder for classified images if needed
classifiedFolder = new File( dir0+"Classified_images" )
if( classifiedFolder.exists() ) {
IJ.log("Folder already exists: " + classifiedFolder.getAbsolutePath())
}else{
classifiedFolder.mkdir()
IJ.log("New folder created: " + classifiedFolder.getAbsolutePath())
}
classifiedImagesFolder=dir0+"Classified_images//"
// Create folder for probability maps if needed
probabilitiesFolder = new File(dir0+"Probability_maps")
if( probabilitiesFolder.exists() ) {
IJ.log("Folder already exists: " + probabilitiesFolder.getAbsolutePath() )
}else{
probabilitiesFolder.mkdir()
IJ.log("New folder created: " + probabilitiesFolder.getAbsolutePath() )
}
probabilityMapsFolder=dir0+"Probability_maps//"
// Create cache folder if needed
cacheFolder = new File( dir0+"Cache" )
if( cacheFolder.exists() ) {
IJ.log("Folder already exists: " + cacheFolder.getAbsolutePath() )
}else{
cacheFolder.mkdir()
IJ.log("New folder created: " + cacheFolder.getAbsolutePath() )
}
cacheFolder=dir0+"Cache//"
Cache1="format=TIFF save=["+cacheFolder+"//Stack0000.tif]"
Cache2="format=TIFF save=["+cacheFolder+"//Probability maps_c001.tif]"
// Settings dialog
gd = new GenericDialogPlus( "settings" )
gd.addMessage("montage to stack?")
gd.addNumericField("images per column", 1, 0)
gd.addNumericField("images per row", 1, 0)
gd.addMessage("")
gd.addCheckbox("enhance contrast?", true)
gd.addCheckbox("probability maps?", true)
gd.showDialog()
if( gd.wasCanceled() )
return
column_number = (int) gd.getNextNumber()
row_number = (int) gd.getNextNumber()
Enhance_Contrast = gd.getNextBoolean()
Probability_maps = gd.getNextBoolean()
a=column_number*row_number
// declare variable to store classified overview
// and probability maps overview folder paths
classifiedOverviewFolder=""
probabilityMapsOverviewFolder=""
// get labels LUT
labelsLut = Utils.getGoldenAngleLUT()
if (a>1) {
overviewFolder = new File( dir0+"Classified_Overview" )
if( overviewFolder.exists() ) {
IJ.log("Folder already exists: " + overviewFolder.getAbsolutePath() )
}else{
overviewFolder.mkdir()
IJ.log("New folder created: " + overviewFolder.getAbsolutePath() )
}
classifiedOverviewFolder=dir0+"Classified_Overview//"
probMapsOverviewFolder = new File( dir0+"Probability_maps_Overview" )
if( probMapsOverviewFolder.exists() ) {
IJ.log("Folder already exists: " + probMapsOverviewFolder.getAbsolutePath() )
}else{
probMapsOverviewFolder.mkdir()
IJ.log("New folder created: " + probMapsOverviewFolder.getAbsolutePath() )
}
probabilityMapsOverviewFolder=dir0+"Probability_maps_Overview//"
}
saturation = 0.3
if ( Enhance_Contrast ) {
gd = new GenericDialogPlus("Enhance Contrast")
gd.addNumericField("How much saturation?", 0.3, 2)
gd.showDialog()
if( gd.wasCanceled() )
return
saturation = gd.getNextNumber()
}
list = (new File( dir1 )).listFiles()
for (j=0	j<list.length	j++) {
// file object
file1=list[j]
// file name
input1 = file1.getName()
// skip hidden files
if (input1.startsWith( "." ) || input1.equals("Thumbs.db") )
continue
// open it
IJ.log("open " + file1)
img = IJ.openImage( file1.getAbsolutePath() )
if ( Enhance_Contrast ) {
IJ.run( img, "Enhance Contrast...", "saturated=" + saturation )
}
//IJ.run(img, "Montage to Stack...", "images_per_row="+row_number+" images_per_column="+column_number+" border=0")
stackMaker = new StackMaker()
stack = stackMaker.makeStack( img.getProcessor(), column_number, row_number, 0 )
IJ.run( new ImagePlus("Stack", stack), "Image Sequence... ", Cache1)
segmentator = new WekaSegmentation( )
if (a>10) {
for (i=0	i<10	i++) {
img = IJ.openImage( cacheFolder+"Stack000"+i+".tif" )
IJ.saveAsTiff(img, stacksFolder+input1+"0"+i+".tif" )
// Create WekaSegmentation object with the selected
// classifier and training data
segmentator.setTrainingImage( img )
segmentator.loadClassifier( classifier )
//segmentator.loadTrainingData( data )
// Get probability maps if selected
if ( Probability_maps ) {
segmentator.applyClassifier( true )
probs = segmentator.getClassifiedImage()
IJ.run( probs, "Image Sequence... ", Cache2 )
}
// Get segmentation (label) image
segmentator.applyClassifier( false )
labels = segmentator.getClassifiedImage()
// apply plugin color LUT
labels.setLut( labelsLut )
IJ.saveAs( labels, "Tiff", classifiedImagesFolder+input1+ String.format("%05d", new Object[]{ new Integer(i)} ) +".tif.tif")
if ( Probability_maps ) {
for( k=0	k<10	k++ )
{
if ( (new File( cacheFolder+"Probability maps000"+k+".tif" )).exists() ) {
prob = IJ.openImage(cacheFolder+"Probability maps000"+k+".tif")
IJ.saveAsTiff( prob, probabilityMapsFolder+input1+String.format("%05d", new Object[]{ new Integer(i)} ) +".tif."+k+".tif")
}
}
}
}
}
if (a<=10) {
for (i=0	i<a	i++) {
img = IJ.openImage( cacheFolder+"Stack000"+i+".tif" )
IJ.saveAsTiff( img, stacksFolder+input1+"0"+i+".tif" )
// Create WekaSegmentation object with the selected
// classifier and training data
segmentator.setTrainingImage( img )
segmentator.loadClassifier( classifier )
//segmentator.loadTrainingData( data )
// Get probability maps if selected
if ( Probability_maps ) {
segmentator.applyClassifier( true )
probs = segmentator.getClassifiedImage()
IJ.run( probs, "Image Sequence... ", Cache2 )
}
// Get segmentation (label) image
segmentator.applyClassifier( false )
labels = segmentator.getClassifiedImage()
// apply plugin color LUT
labels.setLut( labelsLut )
IJ.saveAs( labels, "Tiff", classifiedImagesFolder+input1+String.format("%05d", new Object[]{ new Integer(i)} ) +".tif.tif")
if ( Probability_maps ) {
for( k=0	k<10	k++ )
{
if ( (new File( cacheFolder+"Probability maps000"+k+".tif" )).exists() ) {
prob = IJ.openImage(cacheFolder+"Probability maps000"+k+".tif")
IJ.saveAs( prob, "Tiff", probabilityMapsFolder+input1+String.format("%05d", new Object[]{ new Integer(i)} ) +".tif."+k+".tif")
}
}
}
}
}
for (i=10	i<a	i++) {
img = IJ.openImage( cacheFolder+"Stack00"+i+".tif" )
IJ.saveAsTiff( img, stacksFolder+input1+i+".tif" )
// Create WekaSegmentation object with the selected
// classifier and training data
segmentator.setTrainingImage( img )
segmentator.loadClassifier( classifier )
//segmentator.loadTrainingData( data )
// Get probability maps if selected
if ( Probability_maps ) {
segmentator.applyClassifier( true )
probs = segmentator.getClassifiedImage()
IJ.run( probs, "Image Sequence... ", Cache2 )
}
// Get segmentation (label) image
segmentator.applyClassifier( false )
labels = segmentator.getClassifiedImage()
// apply plugin color LUT
labels.setLut( labelsLut )
IJ.saveAs( labels, "Tiff", classifiedImagesFolder+input1+ String.format("%05d", new Object[]{ new Integer(i)} ) +".tif.tif")
if ( Probability_maps ) {
for( k=0	k<10	k++ )
{
if ( (new File( cacheFolder+"Probability maps000"+k+".tif" )).exists() ) {
prob = IJ.openImage(cacheFolder+"Probability maps000"+k+".tif")
IJ.saveAs( prob, "Tiff", probabilityMapsFolder+input1+String.format("%05d", new Object[]{ new Integer(i)} ) +".tif."+k+".tif")
}
}
}
}
if (a>1) {
img = new ImagePlus[ a ]
for (i=0	i<a	i++) {
//IJ.log( "Opening image " + classifiedImagesFolder+input1+ String.format("%05d", new Object[]{ new Integer(i)} ) +".tif.tif")
img[ i ] = IJ.openImage(classifiedImagesFolder+input1+ String.format("%05d", new Object[]{ new Integer(i)} ) +".tif.tif")
}
stack = new ImageStack( img[0].getWidth(), img[0].getHeight() )
for (i=0	i<a	i++)
stack.addSlice( img[i].getTitle(), img[i].getProcessor() )
imgStack = new ImagePlus( "", stack )
//IJ.run( imgStack, "Make Montage...", "columns="+row_number+" rows="+column_number+" scale=1 first=1 last="+a+" increment=1 border=0 font=" + a )
mm = new MontageMaker()
montage = mm.makeMontage2( imgStack, column_number, row_number, 1.0, 1, a, 1, 0, false )
// apply plugin color LUT
montage.setLut( labelsLut )
IJ.saveAs( montage, "Tiff", classifiedOverviewFolder+input1+".tif")
}
if ( Probability_maps ) {
for( kk=0	kk<10	kk++ )
{
if ( (new File(cacheFolder+"Probability maps000"+kk+".tif")).exists() ) {
if (a>1) {
img = new ImagePlus[ a ]
for (i=0	i<a	i++) {
img[ i ] = IJ.openImage(probabilityMapsFolder+input1+ String.format("%05d", new Object[]{ new Integer(i)} ) +".tif."+kk+".tif")
}
stack = new ImageStack( img[0].getWidth(), img[0].getHeight() )
for (i=0	i<a	i++)
stack.addSlice( img[i].getTitle(), img[i].getProcessor() )
imgStack = new ImagePlus( "", stack )
mm = new MontageMaker()
montage = mm.makeMontage2( imgStack, column_number, row_number, 1.0, 1, a, 1, 0, false )
IJ.saveAs( montage, "Tiff", probabilityMapsOverviewFolder+input1+kk+".tif")
}
}
}
}// end if Probability_maps
}// end for list of files
// delete cache files
list = (new File( cacheFolder )).listFiles()
for (j=0	j<list.length	j++) {
list[j].delete()
}
IJ.log("processing all pictures is finished")
results = new ResultsTable()
if (a>1) {
list = (new File( classifiedOverviewFolder )).listFiles()
for (j=0	j<list.length	j++) {
img = IJ.openImage( list[j].getAbsolutePath() )
totalArea = img.getHeight() * img.getWidth()
// id values of each class in the classified image
//classLabels = new int[]{ 0, 1, 2, 3, 4, 5, 6, 7, 8, 9}
// get label image statistics
is = ImageStatistics.getStatistics( img.getProcessor().convertToByteProcessor( false ) )
// get histogram to calculate area fraction
hist = is.getHistogram()
for( k = 0	k < 10	k ++ )
{
results.incrementCounter()
results.addLabel( Integer.toString( k ) )
results.addValue( "%Area", 100.0 * hist[k] / totalArea )
results.addValue( units+"^2", hist[k] * pixelArea )
results.addValue( "Filename", list[j].getName() )
}
}
}
if (a==1) {
list = (new File( classifiedImagesFolder )).listFiles()
for (j=0	j<list.length	j++) {
img = IJ.openImage( list[j].getAbsolutePath() )
totalArea = img.getHeight() * img.getWidth()
// id values of each class in the classified image
//classLabels = new int[]{ 0, 1, 2, 3, 4, 5, 6, 7, 8, 9 }
// get label image statistics
is = ImageStatistics.getStatistics( img.getProcessor().convertToByteProcessor( false ) )
// get histogram to calculate area fraction
hist = is.getHistogram()
for( k = 0	k < 10	k ++ )
{
results.incrementCounter()
results.addLabel( Integer.toString( k ) )
results.addValue( "%Area", 100.0 * hist[k] / totalArea )
results.addValue( units+"^2", hist[k] * pixelArea )
results.addValue( "Filename", list[j].getName() )
}
}
}
MonthNames = new String[]{ "Jan","Feb","Mar","Apr","May","Jun","Jul","Aug","Sep","Oct","Nov","Dec"}
DayNames = new String[]{ "Sun", "Mon","Tue","Wed","Thu","Fri","Sat" }
date = Calendar.getInstance()
year = date.get(Calendar.YEAR)
month = date.get(Calendar.MONTH)
dayOfWeek = date.get(Calendar.DAY_OF_WEEK)-1
dayOfMonth = date.get(Calendar.DAY_OF_MONTH)
hour = date.get(Calendar.HOUR_OF_DAY)
minute = date.get(Calendar.MINUTE)
second = date.get(Calendar.SECOND)
millisecond = date.get(Calendar.MILLISECOND)
TimeString = DayNames[dayOfWeek]+"_"
if (dayOfMonth<10) {TimeString = TimeString+"0"	}
TimeString = TimeString+dayOfMonth+"-"+MonthNames[month]+"-"+year+"_"
if (hour<10) {TimeString = TimeString+"0"	}
TimeString = TimeString+hour+"-"
if (minute<10) {TimeString = TimeString+"0"	}
TimeString = TimeString+minute+"-"
if (second<10) {TimeString = TimeString+"0"	}
TimeString = TimeString+second
results.saveAs( dir0+"Results_Segmentation_"+TimeString+".xls" )
IJ.log( "Saved result table as " + dir0+"Results_Segmentation_"+TimeString+".xls" )
IJ.beep()
